# Supplementary material
Source: PubMed Central journal article supplement (PMC6482100)
Supplement: NIHMS1524782-supplement-11307_2018_1288_MOESM1_ESM.pdf [file NIHMS1524782-supplement-11307_2018_1288_MOESM1_ESM.pdf]

## Electronic Supplementary Material

**Journal: Molecular Imaging and Biology**

### **[<sup>18</sup>F]FE-OTS964: A TOPK Inhibitor for *In Vivo* PET Imaging in Mouse Brain Cancer Model**

Giacomo Pirovano<sup>1</sup>, Sheryl Roberts<sup>1</sup>, Christian Brand<sup>1</sup>, Patrick L. Donabedian<sup>1</sup>, Christian  
Mason<sup>1</sup>, Paula Demétrio de Souza<sup>1</sup>, Geoff S. Higgins<sup>2</sup>, Thomas Reiner<sup>1,3,\*</sup>

<sup>1</sup> Department of Radiology, Memorial Sloan-Kettering Cancer Center, New York, NY,  
USA

<sup>2</sup> CRUK/MRC Oxford Institute for Radiation Oncology, University of Oxford, Oxford,  
UK

<sup>3</sup> Department of Radiology, Weill Cornell Medical College, New York, NY, USA

**\*Corresponding author:**

Thomas Reiner, Ph.D.

Department of Radiology, MSK

1275 York Avenue

New York, NY 10065

Phone: 646-888-3461

Fax: 646-422-0408

Email: reinert@mskcc.org

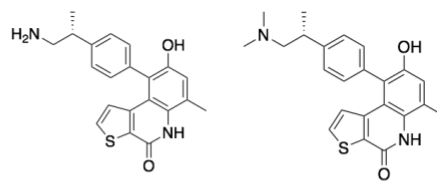

OTS514

OTS964

|                |        |        |
|----------------|--------|--------|
| TOPK IC50 (nM) | 2.6    | 32     |
| MW (g/mol)     | 364.46 | 392.52 |
| clogP (calc)   | 2.95   | 3.63   |

Fig. S1: Structures and relevant physicochemical parameters of OTS514 and OTS964.

|                                                                                           | IC <sub>50</sub> (nM): | PBK | BT549 | T47D | A549 | HT1197 |
|-------------------------------------------------------------------------------------------|------------------------|-----|-------|------|------|--------|
| 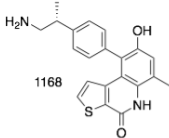<br>1168 |                        |     |       |      |      |        |
| <br>1324 | <b>OTS514</b>          | 2.6 | -     | 8.4  | 6.5  | 27     |
| <br>1307 | <b>OTS964</b>          | 32  | 30    | 66   | 24   | 69     |
| <br>1305 | <b>OTS514-NMe</b>      | 18  | 42    | 85   | 57   | 150    |
|                                                                                           | <b>OTS514-OMe</b>      | 15  | 21    | 40   | 20   | 64     |

Fig. S2: Structures of OTS514 and OTS964 and relevant physicochemical parameters

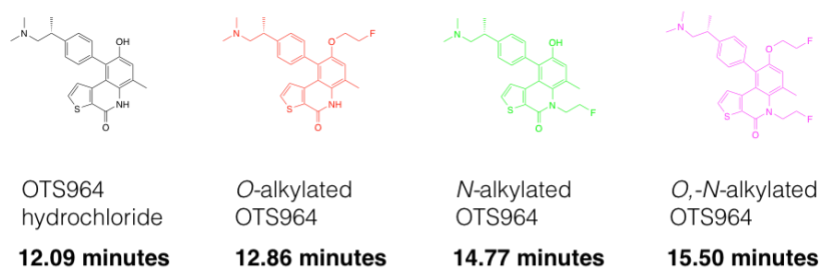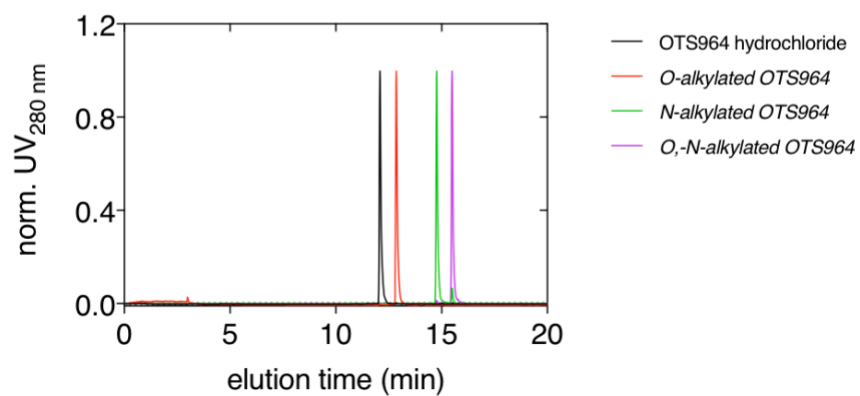

Fig. S3: QC normalized chromatograms of (left to right) OTS964 hydrochloride, *O*-alkylated OTS964, *N*-alkylated OTS964, and *O,N*-alkylated OTS964

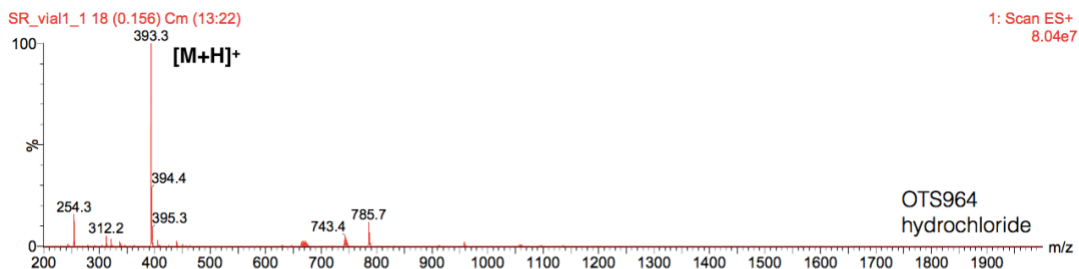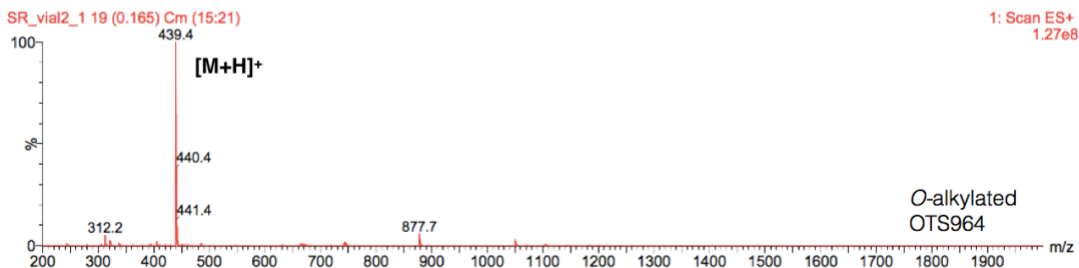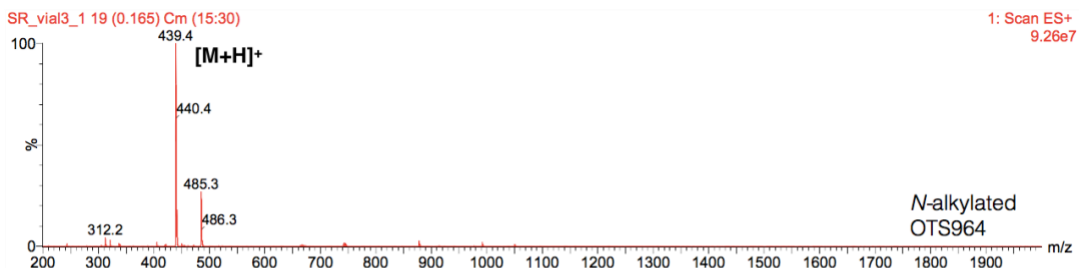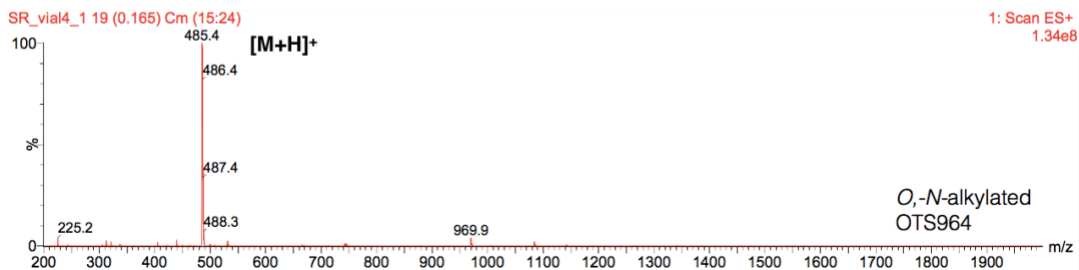

Fig. S4: LC-MS chemical identification of (top to bottom) OTS964 hydrochloride, *O*-alkylated OTS964, *N*-alkylated OTS964, and *O*-,*N*-alkylated OTS964

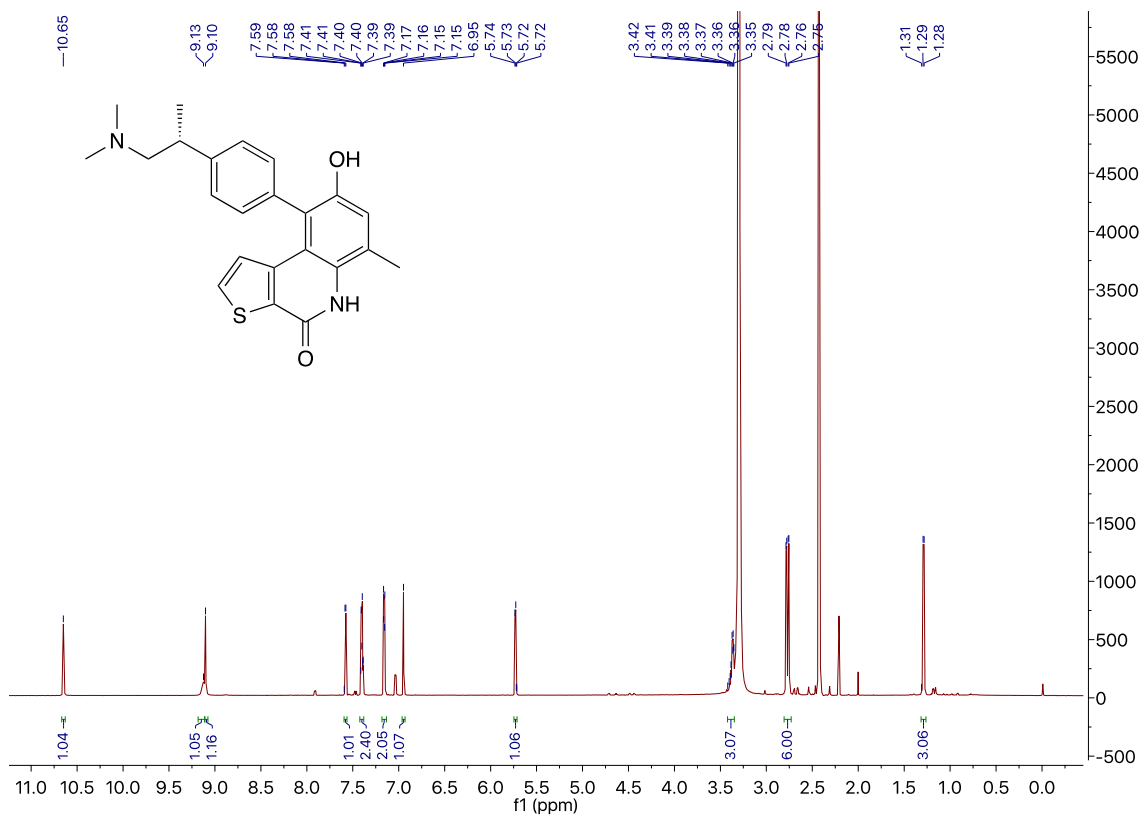

Fig. S5: <sup>1</sup>H NMR of OTS964. <sup>1</sup>H NMR (DMSO-d<sub>6</sub>, 600 MHz): δ 10.65 (s, 1H, -N(CH<sub>3</sub>)<sub>2</sub>H<sup>+</sup>), 9.13 (s, 1H, Ar-NH), 9.10 (s, 1H, -OH), 7.58 (d, *J* = 5.4 Hz, 1H, -CHCHS), 7.42 – 7.38 (m, 2H, -CH<sup>Ar</sup>), 7.18 – 7.13 (m, 2H, -CH<sup>Ar</sup>), 6.95 (s, 1H, -CH<sup>Ar</sup>), 5.73 (d, *J* = 5.4 Hz, 1H, -CHCHS), 3.42 – 3.35 (m, 3H, Ar-CH(CH<sub>3</sub>)CH<sub>2</sub>-), 2.77 (dd, *J* = 13.8, 4.8 Hz, 6H, -N(CH<sub>3</sub>)<sub>2</sub>), 2.43 (s, 3H, -Ar-CH<sub>3</sub>) 1.29 (d, *J* = 6.8 Hz, 3H, -CH<sub>3</sub>). Identity by LC-MS analysis, ESI-MS (ES<sup>+</sup>) calculated for C<sub>23</sub>H<sub>24</sub>FN<sub>2</sub>O<sub>2</sub>S [M+H]<sup>+</sup> *m/z* 393.30, found 393.16

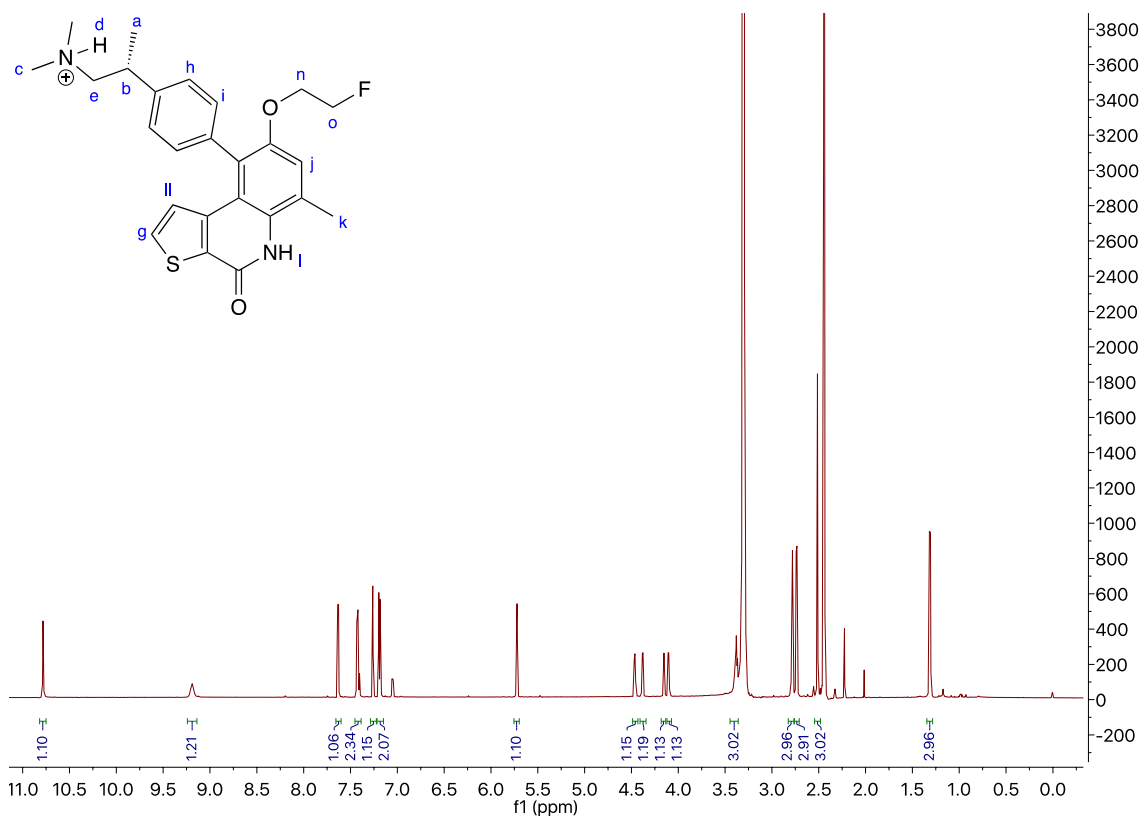

Fig. S6:  $^1\text{H}$  NMR of *O*-alkylated OTS964.  $^1\text{H}$  NMR (DMSO- $d_6$ , 600 MHz):  $\delta$  10.78 (s, 1H,  $-\text{N}(\text{CH}_3)_2\text{H}^+$ ), 9.19 (s, 1H, Ar-NH), 7.63 (d,  $J = 5.4$  Hz, 1H,  $-\text{CHCHS}$ ), 7.45–7.39 (m, 2H,  $-\text{CH}^{\text{Ar}}$ ), 7.26 (s, 1H,  $-\text{CH}^{\text{Ar}}$ ), 7.22–7.15 (m, 2H,  $-\text{CH}^{\text{Ar}}$ ), 5.73 (d,  $J = 5.4$  Hz, 1H,  $-\text{CHCHS}$ ), 4.42 (ddd,  $J = 47.8, 7.5, 3.8$  Hz, 2H,  $-\text{OCH}_2\text{CH}_2\text{F}$ ), 4.13 (ddd,  $J = 30.2, 4.5, 3.2$  Hz, 2H,  $-\text{OCH}_2\text{CH}_2\text{F}$ ), 3.46–3.36 (m, 3H, Ar- $\text{CH}(\text{CH}_3)\text{CH}_2$ -), 2.76 (dd,  $J = 28.7, 4.8$  Hz, 6H,  $-\text{N}(\text{CH}_3)_2$ ), 2.51 (s, 3H, Ar- $\text{CH}_3$ ), 1.31 (d,  $J = 6.7$  Hz, 3H,  $-\text{CH}_3$ ). Identity by LC-MS analysis, ESI-MS ( $\text{ES}^+$ ) calculated for  $\text{C}_{25}\text{H}_{27}\text{FN}_2\text{O}_2\text{S}$   $[\text{M}+\text{H}]^+$   $m/z$  439.4, found 439.18

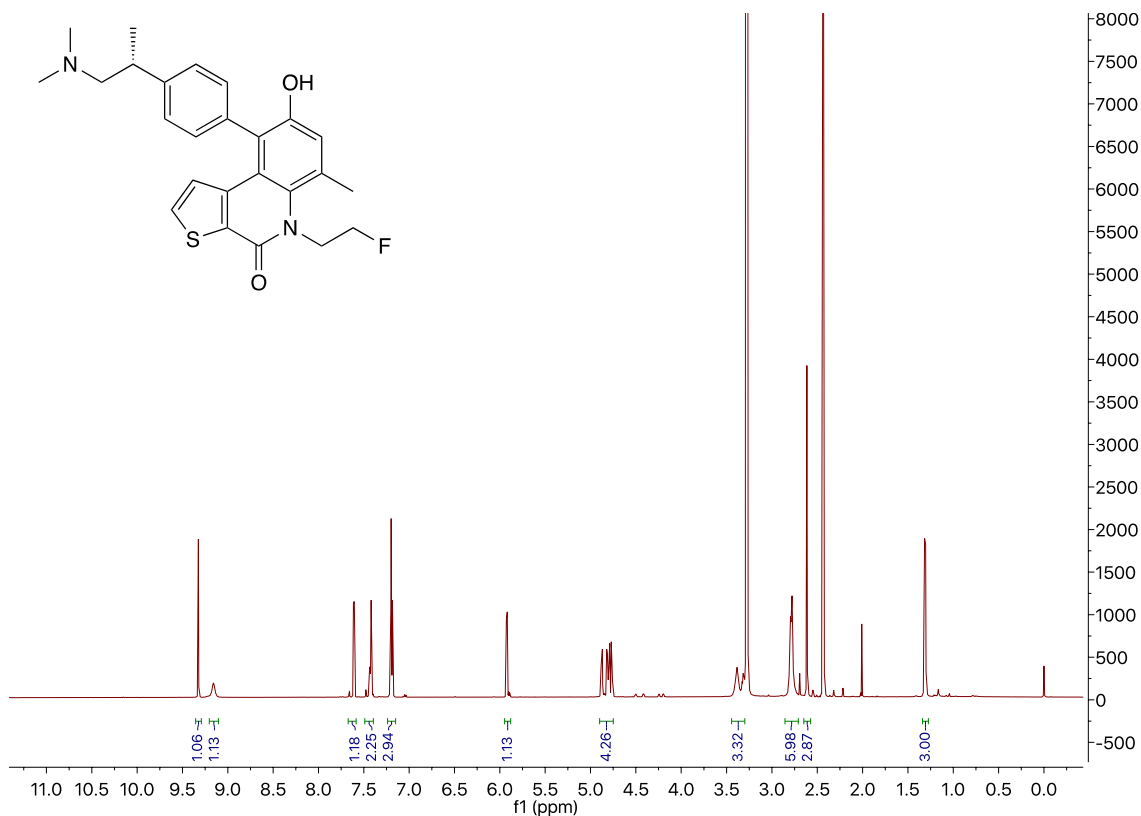

Fig. S7: <sup>1</sup>H NMR of *N*-alkylated OTS964. <sup>1</sup>H NMR (600 MHz, DMSO-*d*<sub>6</sub>) δ 9.32 (s, 1H, -N(CH<sub>3</sub>)<sub>2</sub>H<sup>+</sup>), 9.16 (s, 1H, -OH), 7.61 (d, *J* = 5.5 Hz, 1H, -CHCHS), 7.43 (d, *J* = 7.7 Hz, 2H, -CH<sup>Ar</sup>), 7.24 – 7.15 (m, 3H, -CH<sup>Ar</sup>), 5.92 (d, *J* = 5.5 Hz, 1H, -CHCHS), 4.91 – 4.73 (m, 4H, -NCH<sub>2</sub>CH<sub>2</sub>F), 3.45 – 3.30 (m, 3H, Ar-CH(CH<sub>3</sub>)CH<sub>2</sub>-), 2.86 – 2.71 (m, 6H, -N(CH<sub>3</sub>)<sub>2</sub>), 2.65 – 2.57 (m, 3H, Ar-CH<sub>3</sub>), 1.31 (d, *J* = 6.7 Hz, 3H, -CH<sub>3</sub>). Identity by LC-MS analysis, ESI-MS (ES<sup>+</sup>) calculated for C<sub>25</sub>H<sub>27</sub>FN<sub>2</sub>O<sub>2</sub>S [M+H]<sup>+</sup> *m/z* 439.40, found 439.18



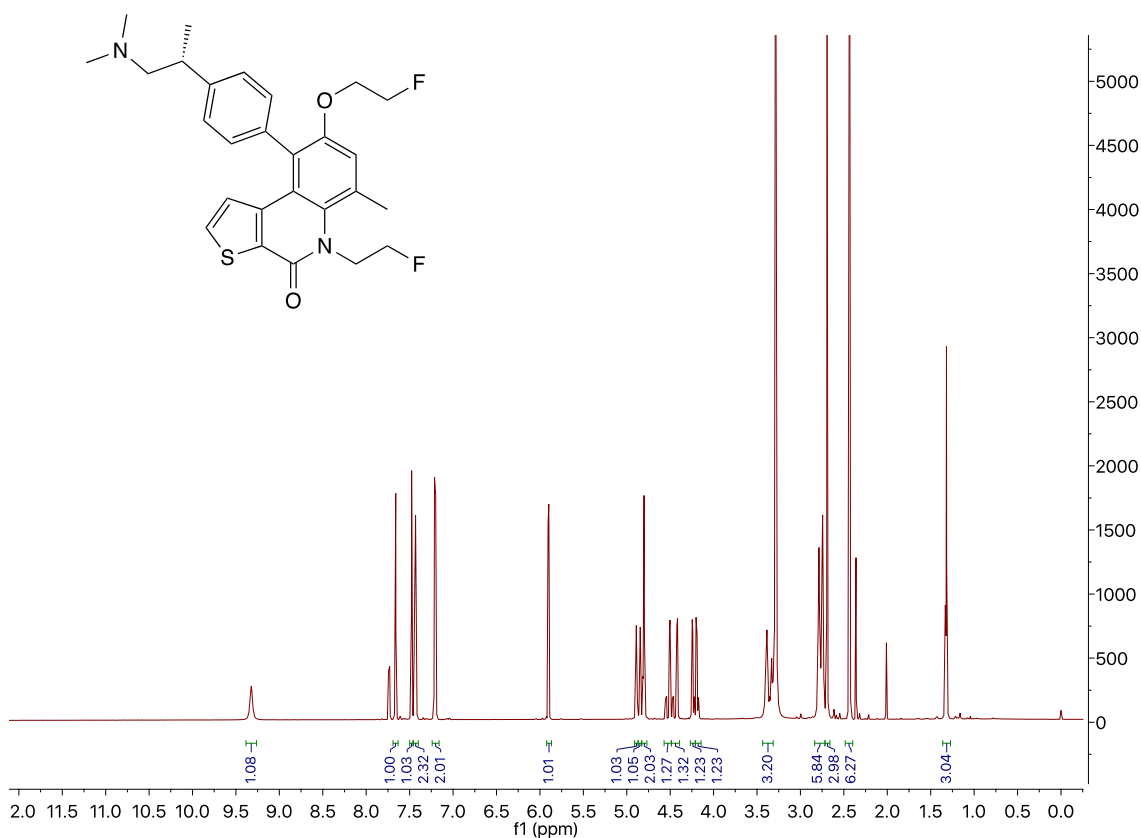

Fig. S8:  $^1\text{H}$  NMR of *O,N*-alkylated OTS964.  $^1\text{H}$  NMR (600 MHz,  $\text{DMSO-}d_6$ )  $\delta$  9.33 (d,  $J = 11.2$  Hz, 1H,  $-\text{N}(\text{CH}_3)_2\text{H}^+$ ), 7.66 (d,  $J = 5.5$  Hz, 1H,  $-\text{CHCHS}$ ), 7.48 (s, 1H,  $-\text{CH}^{\text{Ar}}$ ), 7.43 (m, 2H,  $-\text{CH}^{\text{Ar}}$ ), 7.24 – 7.16 (m, 2H,  $-\text{CH}^{\text{Ar}}$ ), 5.90 (d,  $J = 5.5$  Hz, 1H,  $-\text{CHCHS}$ ), 4.92 – 4.83 (m, 2H,  $-\text{NCH}_2\text{CH}_2\text{F}$ ), 4.83 – 4.77 (m, 2H,  $-\text{NCH}_2\text{CH}_2\text{F}$ ), 4.57 – 4.39 (m, 2H,  $-\text{OCH}_2\text{CH}_2\text{F}$ ), 4.27 – 4.14 (m, 2H,  $-\text{OCH}_2\text{CH}_2\text{F}$ ), 3.36 (m, 3H,  $\text{Ar-CH}(\text{CH}_3)\text{CH}_2-$ ), 2.77 (d,  $J = 25.1$  Hz, 6H,  $-\text{N}(\text{CH}_3)_2$ ), 2.69 (s, 3H,  $\text{Ar-CH}_3$ ), 1.32 (d,  $J = 6.7$  Hz, 3H,  $-\text{CH}_3$ ). Identity by LC-MS analysis, ESI-MS ( $\text{ES}^+$ ) calculated for  $\text{C}_{27}\text{H}_{30}\text{F}_2\text{N}_2\text{O}_2\text{S}$   $[\text{M}+\text{H}]^+$   $m/z$  485.40, found 485.20

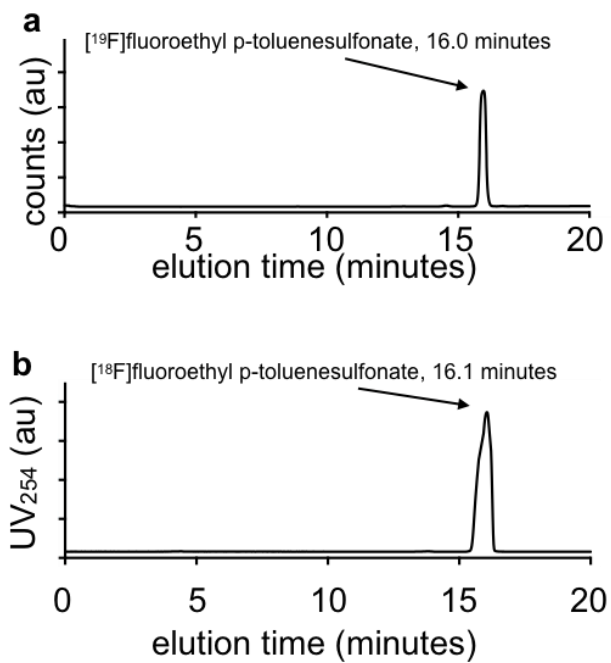

Fig. S9: QC chromatograms of (a)  $[^{19}\text{F}]$ fluoroethyl p-toluenesulfonate and (b)  $[^{18}\text{F}]$ fluoroethyl p-toluenesulfonate.

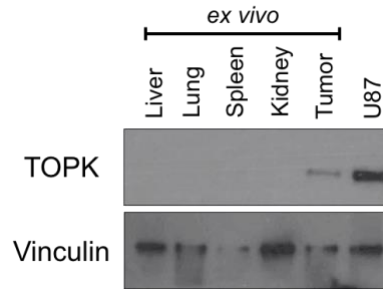

Fig. S10: Expression of human TOPK in murine *ex vivo* tissues, xenografts, and human cultured cancer cells. Vinculin is shown as a loading control.

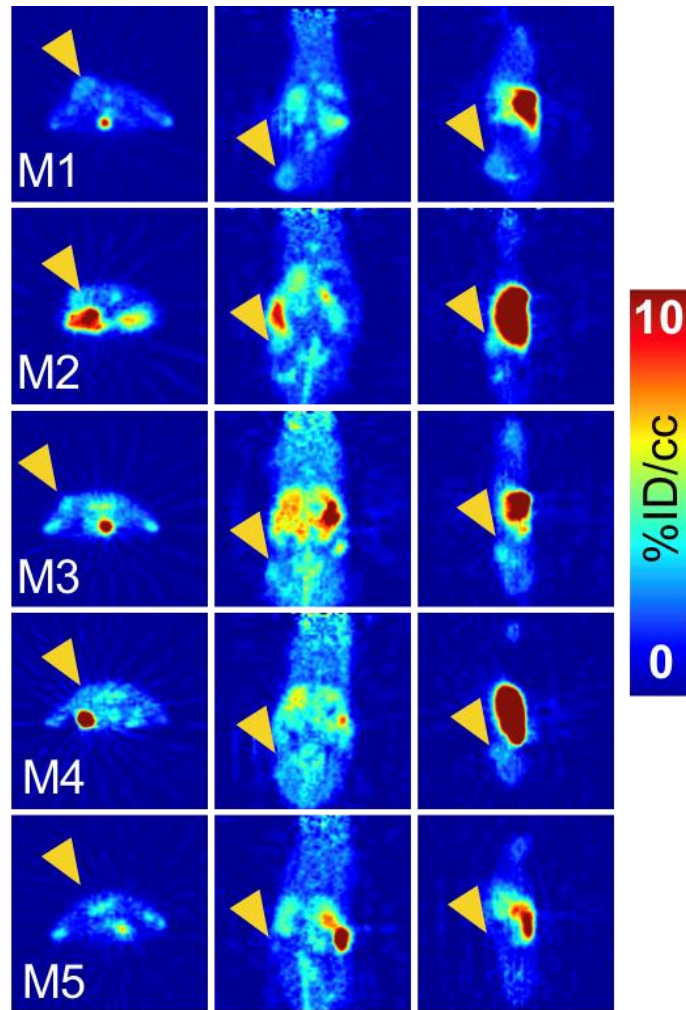

Fig. S11: PET slices for all mice. M1, M2, and M3 are unblocked. M4 and M5 are blocked with excess dose.

Table S1. Complete tabular PET VOI information

| Subject | Volume (mm <sup>3</sup> ) | mean (%ID/cc) | SD (%ID/cc) | min (%ID/cc) | max (%ID/cc) |
|---------|---------------------------|---------------|-------------|--------------|--------------|
| M1      | 123.50                    | 2.76          | 0.31        | 1.95         | 3.48         |
| M2      | 67.42                     | 3.05          | 0.51        | 1.87         | 4.59         |
| M3      | 34.01                     | 3.36          | 0.50        | 1.59         | 4.39         |
| M4      | 34.01                     | 1.70          | 0.95        | -0.49        | 3.48         |
| M5      | 70.40                     | 1.10          | 0.77        | -0.50        | 2.90         |

M1, M2, and M3 are unblocked. M4 and M5 are blocked with excess dose.

**Table S2. Complete tabular biodistribution information (%ID/g)**

| <b>organ</b>    | <b>M1</b> | <b>M2</b> | <b>M3</b>          | <b>M4</b> | <b>M5</b> |
|-----------------|-----------|-----------|--------------------|-----------|-----------|
| blood           | 6.65      | 5.89      | 5.09               | 2.64      | 2.03      |
| tumor           | 3.57      | 3.33      | 3.86               | 1.61      | 1.61      |
| lung            | 2.89      | 8.71      | 0.42               | 2.04      | 2.11      |
| heart           | 2.88      | 1.86      | 3.72               | 2.28      | 1.73      |
| liver           | 4.17      | 5.98      | 6.70               | 4.24      | 2.90      |
| spleen          | 12.32     | 16.07     | 19.65              | 15.93     | 7.70      |
| small intestine | 7.91      | 7.59      | 4.48               | 3.26      | 2.46      |
| large intestine | 5.23      | 4.38      | 4.58               | 6.29      | 1.89      |
| stomach         | 2.86      | 3.47      | 3.42               | 2.62      | 2.93      |
| kidney          | 4.81      | 5.90      | 6.06               | 3.46      | 3.25      |
| muscle          | 1.37      | 1.86      | 1.79               | 1.37      | 1.22      |
| skin            | 0.91      | 2.60      | 2.85               | 1.52      | 0.79      |
| bone            | 3.26      | 1.86      | 17.92 <sup>a</sup> | 2.56      | 2.78      |

<sup>a</sup>Excluded as an outlier (maximum normalized residual - Grubb's - test).
